# Supplementary material for: Plasma cell-free DNA: a potential biomarker for early prediction of severe dengue
Source: PubMed Central journal article supplement (PMC6419393; doi:10.1186/s12941-019-0309-x), 2019-03-13
Supplement: 12941_2019_309_MOESM1_ESM.pdf [file 12941_2019_309_MOESM1_ESM.pdf]

**Additional file 1**

Additional table (Table S1) and figures (Fig. S1 and S2)

**Plasma cell-free DNA: a potential biomarker for early prediction of severe dengue**

Nguyen Thi Ngoc Phuong<sup>1,2,†</sup>, Dao Huy Manh<sup>1,3,†</sup>, Shyam Prakash Dumre<sup>1†</sup>, Shusaku Mizukami<sup>1,4</sup>, Lan Nguyen Weiss<sup>5</sup>, Nguyen Van Thuong<sup>5</sup>, Tran Thi Ngoc Ha<sup>1</sup>, Le Hong Phuc<sup>6</sup>, Tran Van An<sup>6</sup>, Thuan Minh Tieu<sup>7,8</sup>, Mohamed Gomaa Kamel<sup>7,9</sup>, Mostafa Ebraheem Morra<sup>7,10</sup>, Vu Thi Que Huong<sup>5</sup>, Nguyen Tien Huy<sup>4,7,\*</sup>, Kenji Hirayama<sup>1,\*</sup>

<sup>1</sup>Department of Immunogenetics, Institute of Tropical Medicine (NEKKEN), Nagasaki University, Nagasaki, Japan; <sup>2</sup>Health Innovation course, School of Tropical Medicine and Global Health, Nagasaki University, Nagasaki, Japan; <sup>3</sup>Global Leader Nurturing Program, Graduate School of Biomedical Sciences, Nagasaki University, Nagasaki, Japan; <sup>4</sup>Department of Clinical Product Development, Institute of Tropical Medicine (NEKKEN), Nagasaki University, Nagasaki, Japan; <sup>5</sup>Department of Immunology and Microbiology, Pasteur Institute, Ho Chi Minh City, Vietnam; <sup>6</sup>Nguyen Dinh Chieu Hospital, Ben Tre Province, Vietnam; <sup>7</sup>Online research Club ([www.onlineresearchclub.org/](http://www.onlineresearchclub.org/)); <sup>8</sup>Faculty of Health Sciences, McMaster University, Hamilton, Canada; <sup>9</sup>Faculty of Medicine, Minia University, Minia, Egypt; and <sup>10</sup>Faculty of Medicine, Alazhar University, Cairo, 11884, Egypt.

<sup>†</sup>These authors contributed equally to this work.

**\*Correspondence to:** Kenji Hirayama (E-mail: [hiraken@nagasaki-u.ac.jp](mailto:hiraken@nagasaki-u.ac.jp)) or Nguyen Tien Huy (E-mail: [tienhuy@nagasaki-u.ac.jp](mailto:tienhuy@nagasaki-u.ac.jp)), Department of Immunogenetics or Department of Clinical Product Development, Institute of Tropical Medicine, Nagasaki University, 1-12-4 Sakamoto, Nagasaki 852-8523, Japan.

### Additional table S1

Diagnostic assay results of the eligible dengue patients (n = 61)

| Assay performed | Assay results, n (%) |           |          |
|-----------------|----------------------|-----------|----------|
|                 | Positive             | Negative* | Total    |
| NS1             | 59 (96.7)            | 2 (3.3)   | 61 (100) |
| RT-PCR          | 39 (63.9)            | 22 (36.1) | 61 (100) |
| ELISA           | 44 (72.1)            | 17 (27.9) | 61 (100) |

\*Two cases negative by NS1 were confirmed positive by RT-PCR. A total of 27 patients were positive by both RT-PCR and ELISA, and the remaining patients had positive results by either ELISA or RT-PCR. All the healthy control samples (n = 9) were tested negative by all of these three assays.

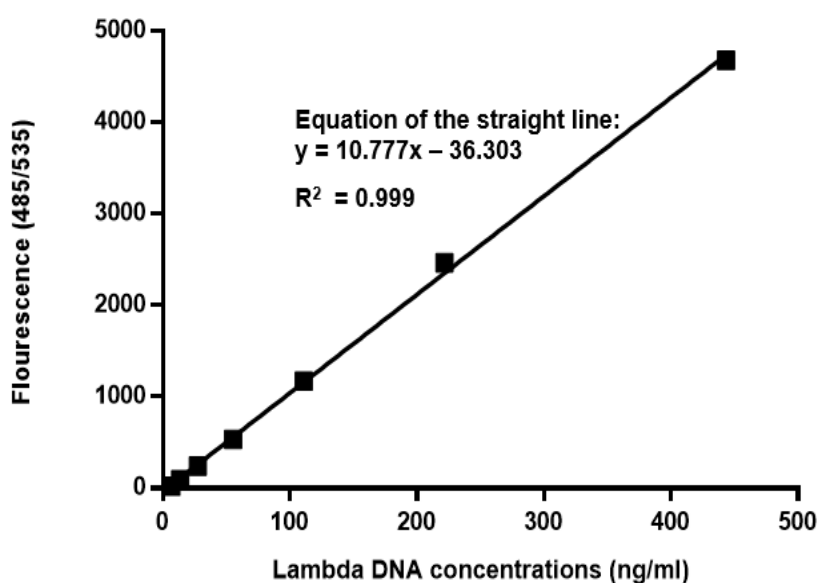

### Additional fig. S1

Standard curve plot of Lambda DNA. To create the standard curve, known concentrations of Lambda DNA (X-axis) were used and after 5 minutes of dark incubation with PicoGreen working solution, the fluorescence intensity (Y-axis) measured at 485 nm excitation and 535 nm emission using fluorescence microplate reader. The linearity of standard curve was found in the range of 6.9 to 443.4 ng/mL. The resulting equation:  $y = 10.777x - 36.303$ ,  $R^2 = 0.999$  was used to estimate the DNA concentration of samples.

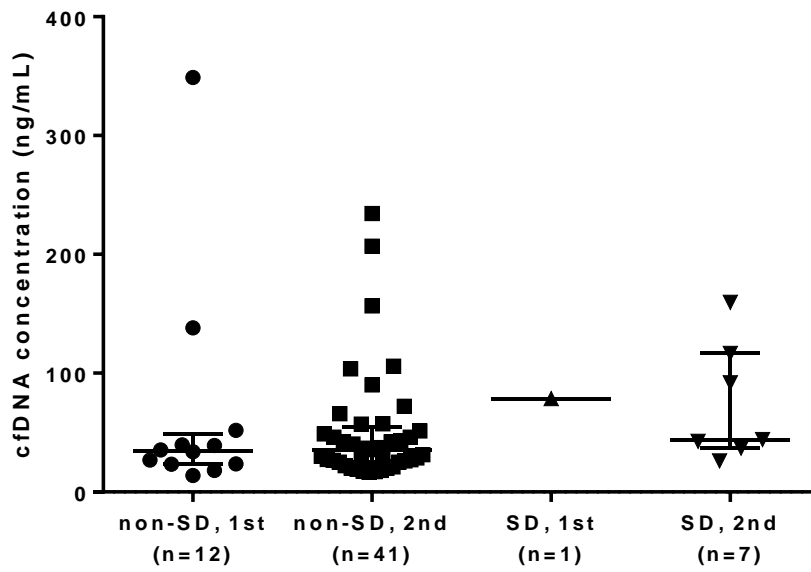

**Additional fig. S2**

**cfDNA levels between primary and secondary dengue infection.** Comparison was not done for primary infection with severe dengue due to sample number (n = 1)

1<sup>st</sup> = primary dengue infection; 2<sup>nd</sup> = secondary dengue infection

**Additional file 2**

Supplementary data set on demographic, laboratory and clinical details of all eligible patients (n = 61) including their diagnosis and clinical course information.

This data has been provided as a separate Excel sheet (**Additional file 2.xlsx**).
